# Supplementary material
Source: PubMed Central journal article supplement (PMC3223476)
Supplement: 1112037108_pnas.201112037SI.pdf [file 1112037108_pnas.201112037SI.pdf]

# Supporting Information

Adjalley et al. 10.1073/pnas.1112037108

## SI Materials and Methods

To generate our summary of the gametocyte inhibition data (Fig. P1A), we used the luciferase values from those drug assays (Figs. 3 and 4) at  $5\times$  the  $IC_{50}$  (Table 1). These values indicate the portion of inhibition attributable to drug action. On examination of the data, we observed that the luciferase counts typically fell by a constant proportion every treatment day, with that proportion being unique to each drug (Fig. S1) at each stage. In our fitting,  $y(t)$  is the luciferase value for a given drug before ( $t = 0$ ) and after ( $t > 0$ ) treatment. We thus curve fit the equation  $y(t) = y(0) \cdot \alpha^t$  for days  $t \in (0, t_{SSE})$ . We call  $\alpha$  the remaining fraction and  $t_{SSE}$  the stage-specific end time (defined below). The curve fitting was done by maximizing the  $R^2$  goodness of fit measure.

The luciferase data curve fitting of  $y(t)$  was applied for the days in which gametocytes would be expected to remain within that developmental stage. For example, when curve fitting the stages I and II data, we fit our equation to days 1–4 posttreatment, because gametocytes are in stages I and II for  $\sim 4$  d. For stage III data, we fit to days 1–3 posttreatment, because gametocytes are in stage III for  $\sim 3$  d; for stage IV, we fit to days 1–3 posttreatment, and for stage V, we fit to days 1–4 posttreatment.

After the remaining fraction constants were obtained for each stage, we applied them to generate a loss curve over all of the

gametocyte developmental stages. This curve stipulated an upper bound of  $\alpha = 1$  (i.e., we assumed that gametocyte populations could not increase during drug treatment). Starting with a hypothetical population of gametocytes, we multiplied the appropriate remaining fraction to the population as it aged to simulate the effects of constant drug exposure. Curves generated for days 0–12 are displayed in Fig. P1A.

After analyzing these curve fits, we noticed that the action of certain drugs on later gametocyte stages did not follow a smooth pattern. Rather than exhibiting a monotonic decline after drug exposure or no robust trend at all, certain drugs showed a small rise in luciferase counts before these values consistently fell. For these drugs, including atovaquone, tafenoquine, and lumefantrine, it seemed that the drug action against later stage gametocytes was delayed by a few days. Thus, for these drugs, we repeated the curve fitting exercise by delaying the curve fitting until the initial peak in luciferase counts had fallen and a downward trend was observed.

The stage-specific remainder fractions for drug assays at  $5\times$  the  $IC_{50}$  for all drugs and atovaquone, tafenoquine, and lumefantrine adjusted for delayed action are shown in Table S5.



**Table S1. Effect of antimalarials on transmission of drug-treated *Plasmodium falciparum* gametocytes to *Anopheles* mosquitoes: Dihydroartemisinin and lumefantrine (18 d postinduction)**

| Treatment                              | Experiment 1 |      |                   |                    |                   |                    | Experiment 2 |       |                   |                    |                   |                    |
|----------------------------------------|--------------|------|-------------------|--------------------|-------------------|--------------------|--------------|-------|-------------------|--------------------|-------------------|--------------------|
|                                        | CTRL         | DMSO | DHA 1×<br>(24 nM) | DHA 5×<br>(120 nM) | LMF 1×<br>(66 nM) | LMF 5×<br>(330 nM) | CTRL         | DMSO  | DHA 1×<br>(24 nM) | DHA 5×<br>(120 nM) | LMF 1×<br>(66 nM) | LMF 5×<br>(330 nM) |
| Mosquitoes                             | 15           | 15   | 15                | 15                 | 17                | 14                 | 19           | 16    | 15                | 18                 | 19                | 15                 |
| Block in transmission (%) <sup>*</sup> | 0            | 0    | 7                 | 13                 | 0                 | 14                 | 0            | 0     | 0                 | 0                  | 0                 | 0                  |
| Oocyst mean                            | 48           | 34   | 26                | 8                  | 21                | 4                  | 47           | 48    | 36                | 14                 | 11                | 8                  |
| Oocyst range                           | 5–73         | 5–70 | 0–48              | 0–22               | 1–17              | 0–9                | 2–143        | 12–97 | 7–71              | 2–47               | 3–33              | 1–35               |
| Reduction in oocysts (%) <sup>†</sup>  | N/A          | N/A  | 24                | 76                 | 38                | 88                 | N/A          | N/A   | 25                | 71                 | 77                | 83                 |
| <i>P</i> value <sup>‡</sup>            | N/A          | N/A  | 0.28              | <0.0001            | 0.06              | <0.0001            | N/A          | N/A   | 0.15              | <0.0001            | <0.0001           | <0.0001            |

CTRL, untreated control; DHA, dihydroartemisinin; LMF, lumefantrine; N/A, not applicable.

<sup>\*</sup>Percent block in transmission is defined as the percent of mosquitoes that were uninfected after drug treatment of gametocytes. All mosquitoes fed untreated or mock-treated gametocytes were positive (corresponding to an infection prevalence of 100%).

<sup>†</sup>Compared with DMSO values.

<sup>‡</sup>Statistical significance was determined using a Student *t* test.

**Table S2. Effect of antimalarials on transmission of drug-treated *Plasmodium falciparum* gametocytes to *Anopheles* mosquitoes: Monodesethyl-amodiaquine and piperazine (17 d postinduction)**

| Treatment                              | Experiment 1 |       |                         |                          |                   |                    | Experiment 2 |       |                      |                       |                   |                    |
|----------------------------------------|--------------|-------|-------------------------|--------------------------|-------------------|--------------------|--------------|-------|----------------------|-----------------------|-------------------|--------------------|
|                                        | CTRL         | DMSO  | mdAQ<br>0.5×<br>(30 nM) | mdAQ<br>2.5×<br>(150 nM) | PPQ 1×<br>(35 nM) | PPQ 5×<br>(175 nM) | CTRL         | DMSO  | mdAQ 0.5×<br>(30 nM) | mdAQ 2.5×<br>(150 nM) | PPQ 1×<br>(35 nM) | PPQ 5×<br>(175 nM) |
| Mosquitoes                             | 24           | 24    | 24                      | 24                       | 25                | 23                 | 22           | 20    | 22                   | 25                    | 20                | 25                 |
| Block in transmission (%) <sup>*</sup> | 0            | 0     | 0                       | 0                        | 0                 | 0                  | 0            | 0     | 0                    | 0                     | 0                 | 0                  |
| Oocyst mean                            | 67           | 77    | 54                      | 100                      | 87                | 96                 | 44           | 31    | 49                   | 38                    | 90                | 89                 |
| Oocyst range                           | 18–134       | 6–203 | 9–129                   | 4–212                    | 8–160             | 3–207              | 3–105        | 1–114 | 12–100               | 2–90                  | 41–155            | 3–197              |
| Reduction in oocysts (%) <sup>†</sup>  | N/A          | N/A   | 30                      | –30                      | –13               | –25                | N/A          | N/A   | –58                  | –23                   | –190              | –187               |
| <i>P</i> value <sup>‡</sup>            | N/A          | N/A   | 0.06                    | 0.13                     | 0.40              | 0.24               | N/A          | N/A   | 0.02                 | 0.43                  | <0.0001           | <0.0001            |

CTRL, untreated control; mdAQ, monodesethyl-amodiaquine; N/A, not applicable; PPQ, piperazine.

<sup>\*</sup>Percent block in transmission is defined as the percent of mosquitoes that were uninfected after drug treatment of gametocytes. All mosquitoes fed untreated or mock-treated gametocytes were positive (corresponding to an infection prevalence of 100%).

<sup>†</sup>Compared with DMSO values.

<sup>‡</sup>Statistical significance was determined using a Student *t* test.

**Table S3. Effect of antimalarials on transmission of drug-treated *Plasmodium falciparum* gametocytes to *Anopheles* mosquitoes: Pyronaridine and methylene blue (18 d postinduction)**

| Treatment                              | Experiment 1 |      |                   |                   |                      |                     | Experiment 2 |      |                   |                   |                      |                     |
|----------------------------------------|--------------|------|-------------------|-------------------|----------------------|---------------------|--------------|------|-------------------|-------------------|----------------------|---------------------|
|                                        | CTRL         | DMSO | PND 1×<br>(17 nM) | PND 5×<br>(85 nM) | MB 0.25×<br>(7.5 nM) | MB 1.25×<br>(38 nM) | CTRL         | DMSO | PND 1×<br>(17 nM) | PND 5×<br>(85 nM) | MB 0.25×<br>(7.5 nM) | MB 1.25×<br>(38 nM) |
| Mosquitoes                             | 24           | 23   | 20                | 19                | 24                   | 18                  | 14           | 21   | 17                | 15                | 22                   | 23                  |
| Block in transmission (%) <sup>*</sup> | 8            | 0    | 5                 | 21                | 12                   | 100                 | 0            | 0    | 6                 | 27                | 5                    | 78                  |
| Oocyst mean                            | 16           | 12   | 13                | 4                 | 7                    | 0                   | 13           | 17   | 9                 | 2                 | 13                   | 0                   |
| Oocyst range                           | 0–53         | 2–28 | 0–37              | 0–8               | 0–34                 | 0                   | 3–27         | 2–48 | 0–20              | 0–6               | 0–44                 | 0–1                 |
| Reduction in oocysts (%) <sup>†</sup>  | N/A          | N/A  | –8                | 67                | 56                   | 100                 | N/A          | N/A  | 47                | 88                | 0                    | 98                  |
| <i>P</i> value <sup>‡</sup>            | N/A          | N/A  | 0.73              | 0.0001            | 0.03                 | —                   | N/A          | N/A  | 0.02              | <0.0001           | 0.29                 | <0.0001             |

CTRL, untreated control; MB, methylene blue; PND, pyronaridine.

<sup>\*</sup>Percent block in transmission is defined as the percent of mosquitoes that were uninfected after drug treatment of gametocytes.

<sup>†</sup>Compared with DMSO values, except for MB (compared with untreated control).

<sup>‡</sup>Statistical significance was determined using a Student *t* test.

**Table S4. List of oligonucleotides used in this study**

| Name  | Nucleotide sequence                                             | Description                              |
|-------|-----------------------------------------------------------------|------------------------------------------|
| p836  | ACGAATTCTTAGCTAATTCGCTTGAAGA                                    | <i>PcDT</i> 5'UTR forward                |
| p838  | ACGGTACCGGATATGGCAGCTTAATGTT                                    | <i>PbDT</i> 3'UTR reverse                |
| p984  | GAATCGATATTGTTACAACACC                                          | Luciferase sequence forward              |
| p1513 | gccgGACGTCGAACAAATACATAAGAGCGCCA                                | <i>cg6</i> 5' forward with AatII site    |
| p1514 | CCGCGATGATCCTGACGACGGAGACCGCGTCGTCGACAAGCCGCATGTTTCATGCTCCTCAAC | <i>cg6</i> 5' reverse with attB site     |
| p1515 | CGGCTTGTGACGACGACGGGCTCCGTCGTCAGGATCATCGCGGATAATGATAAATGTAT     | <i>cg6</i> 3' forward with attB site     |
| p1516 | gccgGACGTCCTTTAATTTTATTTGGTCATGCAATTCTTGCAAC                    | <i>cg6</i> 3' reverse with AatII site    |
| p2145 | GGGCCCGTAGCTATCCAAAAATAAATATCC                                  | <i>pfs16</i> forward with Apal site      |
| p2146 | CCTAGGGTTGAAGAAAAGTATAAATAGAAAAATGGC                            | <i>pfs16</i> reverse with AvrII site     |
| p2147 | GGGCCCATTTCTATATATTTATGGAGATAAATGTAAGGTAATATAC                  | <i>pfs48/45</i> forward with Apal site   |
| p2148 | CCTAGGGTATAAAGAAAAAATTGTAATAAATTTAAAAAATTTAAGTGAATATG           | <i>pfs48/45</i> reverse with AvrII site  |
| p2151 | GGGCCCTCTATATACTATGGAATATGTGC                                   | <i>mal8p1.16</i> forward with Apal site  |
| p2152 | CCTAGGTGCGTGGGATTAATATTTAATG                                    | <i>mal8p1.16</i> reverse with AvrII site |
| p1636 | CCTAAActcgagAATGGTTGGTTCGCTAACTGC                               | <i>hdhfr</i> coding sequence forward     |
| p1655 | CATTGAATTATTGCTCAACGCT                                          | <i>cg6</i> 5'UTR forward                 |
| p1656 | CAAACCACAAGCACATAATGGT                                          | <i>cg6</i> 3'UTR reverse                 |
| p1969 | GAAAATATTATTACAAAGGGTGAGG                                       | <i>cg6</i> coding sequence forward       |
| p1970 | CTCTTACTCTTTCGAATTC                                             | <i>cg6</i> coding sequence reverse       |

*cg6*, glutaredoxin-like gene; *hdhfr*, human *dhfr*; *PbDT*, *Plasmodium berghei* dihydrofolate reductase-thymidylate synthase (*dhfr-ts*); *PcDT*, *P. chabaudi dhfr-ts*; UTR, untranslated region. *PbDT*, PBANKA\_071930 (PlasmoDB); *PcDT*, PCHAS\_072830 (PlasmoDB); *cg6*, PF07\_0036 (PlasmoDB); *hdhfr*, NG\_023304.1 (GenBank); firefly luciferase, M15077.1 (GenBank); *pfs16*, PFD0310w (PlasmoDB); *pfs48/45*, PF13\_0247 (PlasmoDB); *mal8p1.16*, MAL8P1.16 (PlasmoDB).

**Table S5. Stage-specific remaining fraction constants for *Plasmodium falciparum* gametocyte drug assays**

| Drug               | Stages I and II | Stage III | Stage IV | Stage V |
|--------------------|-----------------|-----------|----------|---------|
| Atovaquone         | 0.874           | 1         | 1        | 1       |
| Atovaquone         | 0.874           | 0.792     | 0.685    | 0.704   |
| Tafenoquine        | 0.823           | 1         | 1        | 1       |
| Tafenoquine        | 0.823           | 0.457     | 0.819    | 0.713   |
| Lumefantrine       | 0.776           | 1         | 1        | 1       |
| Lumefantrine       | 0.776           | 0.791     | 0.838    | 0.889   |
| Piperaquine        | 0.697           | 0.895     | 1        | 1       |
| Primaquine         | 0.767           | 0.821     | 0.884    | 0.841   |
| Pyronaridine       | 0.620           | 0.858     | 1        | 1       |
| md-amodiaquine     | 0.526           | 0.775     | 1        | 1       |
| Dihydroartemisinin | 0.547           | 0.826     | 0.812    | 0.831   |
| Methylene blue     | 0.333           | 0.724     | 0.695    | 0.605   |

Values show the stage-specific remainder fractions for drug assays at 5× the IC<sub>50</sub>. These data were used to generate the loss curves in Fig. P1A. Smaller values indicate greater gametocytocidal effect. For atovaquone, tafenoquine, and lumefantrine, the second row provides the remainder fractions adjusted for delayed action (*SI Materials and Methods*). md-amodiaquine, monodesethyl-amodiaquine.
